# Supplementary material
Source: Springer Nature journal article supplement (https://www.springermedizin.de/resource/supplementary/12943_2009_580_MOESM10_ESM.pdf/9555018)

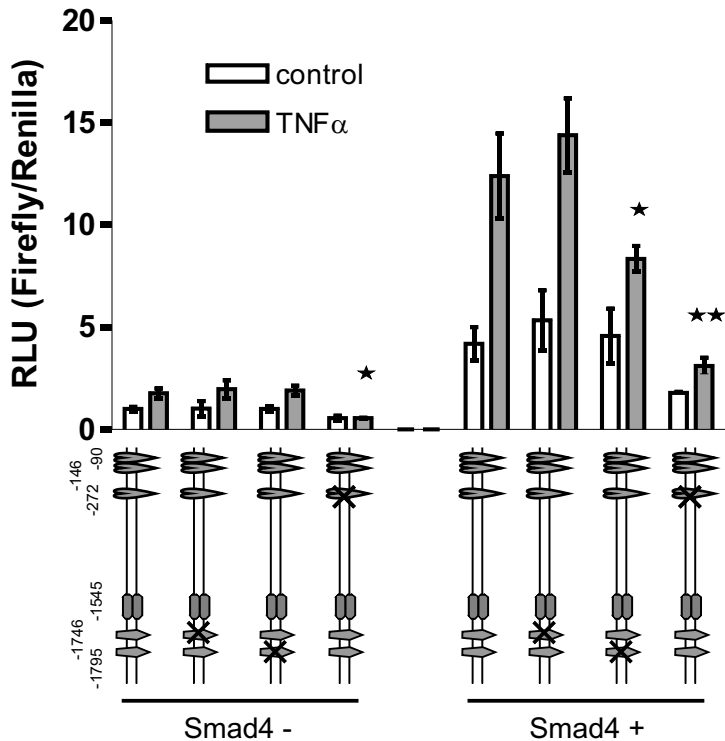

SBE

AP1-site

NF- $\kappa$ B-site

Supplement: MOESM10 [file 9555018]
